# Supplementary material
Source: HighWire-hosted journal article supplement (https://bmjopen.bmj.com/content/14/7/e085705)
Supplement: inline-supplementary-material-1 [file inline-supplementary-material-1.pdf]

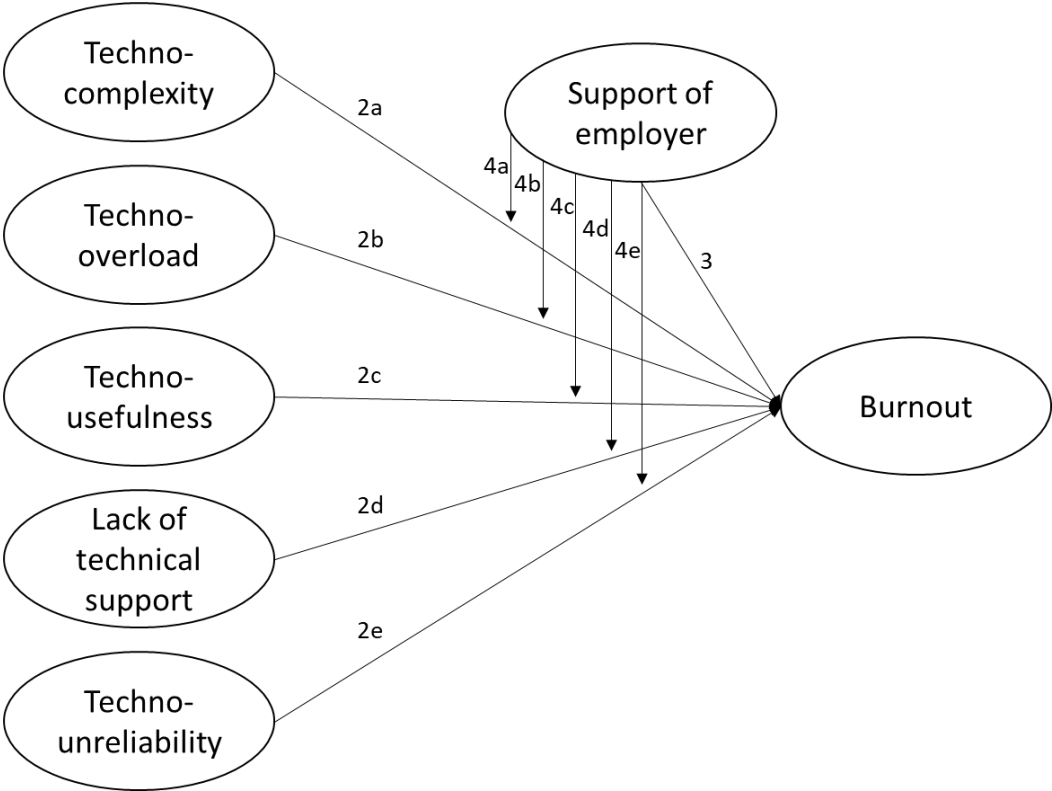

**Supplementary Figure A.** Conceptual model with hypotheses 2-4 on the relationship between indicators of technostress, support offered by the employer and burnout

**Supplementary Table A.** Overview of the reported scales and items of the online questionnaire

| Section                                                           | Scales/items                                                                                                                                   | Number of items | Response categories                                                                                                                                                                                                                | Reference                                                                            |
|-------------------------------------------------------------------|------------------------------------------------------------------------------------------------------------------------------------------------|-----------------|------------------------------------------------------------------------------------------------------------------------------------------------------------------------------------------------------------------------------------|--------------------------------------------------------------------------------------|
| Sociodemographic data: Personal details and workplace information | Age                                                                                                                                            | 1               | Up to 19 years, 20-29, 30-39, 40-49, 50-59, 60 years or older                                                                                                                                                                      | Self-developed                                                                       |
|                                                                   | Sex                                                                                                                                            | 1               | Male, female, diverse                                                                                                                                                                                                              |                                                                                      |
|                                                                   | German as mother tongue                                                                                                                        | 1               | Yes, no                                                                                                                                                                                                                            |                                                                                      |
|                                                                   | Professional qualification                                                                                                                     | 1               | General nurse, paediatric nurse, geriatric nurse, nursing assistant (old and new professional training)                                                                                                                            |                                                                                      |
|                                                                   | Working time                                                                                                                                   | 1               | Full-time with 35 hours/week or more, part-time with 15-34 hours/week, part-time or hourly employed with less than 15 hours/week                                                                                                   |                                                                                      |
|                                                                   | Work experience in the current hospital, overall work experience                                                                               | 2               | 1-5 years, 6-10 years, 11-15 years, more than 15 years                                                                                                                                                                             |                                                                                      |
|                                                                   | Leadership position                                                                                                                            | 1               | Yes, no                                                                                                                                                                                                                            |                                                                                      |
|                                                                   | Ownership of the hospital                                                                                                                      | 1               | Private, public, non-profit, I don't know                                                                                                                                                                                          |                                                                                      |
|                                                                   | Number of beds of the hospital                                                                                                                 | 1               | Up to 299 beds, 300-599, 600 beds or more, I don't know                                                                                                                                                                            |                                                                                      |
|                                                                   | Federal state of the hospital                                                                                                                  | 1               | Baden-Württemberg, Bavaria, Berlin, Brandenburg, Bremen, Hamburg, Hesse, Lower Saxony, Mecklenburg-Western Pomerania, North Rhine-Westphalia, Rhineland-Palatinate, Saarland, Saxony, Saxony-Anhalt, Schleswig-Holstein, Thuringia |                                                                                      |
| Use of information and communication technologies (ICT)           | Average time of use of ICT on a typical working day in the last month                                                                          | 8               | 0, 0.5, 1, 1.5, 2, 2.5, 3, 3.5, 4, 4.5, 5, 5.5, 6, 6.5, 7, 7.5, 8, 8.5, 9, 9.5, 10 hours/day                                                                                                                                       | Adapted from Bail et al. 2023 <sup>29</sup>                                          |
| Information on technostress                                       | Techno-complexity, techno-overload, techno-usefulness, lack of technical support and techno-unreliability of the Digital Stressors Scale (DSS) | 25              | 1 = strongly disagree, 2, 3, 4, 5, 6, 7 = strongly agree                                                                                                                                                                           | Fischer et al. 2021 <sup>13</sup> (German version: Riedl et al. 2022 <sup>44</sup> ) |

|                                |                                                                          |   |                                                             |                                                                                           |
|--------------------------------|--------------------------------------------------------------------------|---|-------------------------------------------------------------|-------------------------------------------------------------------------------------------|
| Information on work and health | Personal burnout of the Copenhagen Burnout Inventory (CBI)               | 6 | Never/almost never, seldom, sometimes, often, always        | Kristensen et al. 2005 <sup>15</sup> (German version: Nübling et al. 2005 <sup>45</sup> ) |
| Support offers                 | Availability of support offers                                           | 1 | a) Yes, b) yes, but I don't use these support offers, c) no | Self-developed                                                                            |
|                                | a) Specification of support offers, usefulness of support offers         | 2 | Free-text format                                            |                                                                                           |
|                                | b) Specification of support offers, reasons for not using support offers | 2 | Free-text format                                            |                                                                                           |
|                                | c) Requests for further support offers                                   | 1 | Free-text format                                            |                                                                                           |

**Supplementary Table B.** Description of the hospitals in which the study participants were employed (n=303)

| Variables                     | n   | %    |
|-------------------------------|-----|------|
| Type of hospital ownership    |     |      |
| Public                        | 190 | 62.7 |
| Non-profit                    | 75  | 24.8 |
| Private                       | 28  | 9.2  |
| Unknown                       | 10  | 3.3  |
| Number of hospital beds       |     |      |
| ≤ 299 beds                    | 99  | 32.7 |
| 300-599 beds                  | 86  | 28.4 |
| ≥ 600 beds                    | 107 | 35.3 |
| Unknown                       | 11  | 3.6  |
| Federal state of the hospital |     |      |
| Bavaria                       | 114 | 37.6 |
| North Rhine-Westphalia        | 66  | 21.8 |
| Lower Saxony                  | 22  | 7.3  |
| Hesse                         | 21  | 6.9  |
| Saarland                      | 15  | 5.0  |
| Hamburg                       | 12  | 4.0  |
| Brandenburg                   | 8   | 2.6  |
| Baden-Württemberg             | 7   | 2.3  |
| Bremen                        | 7   | 2.3  |
| Rhineland-Palatinate          | 7   | 2.3  |
| Saxony-Anhalt                 | 6   | 2.0  |
| Schleswig-Holstein            | 6   | 2.0  |
| Berlin                        | 4   | 1.3  |
| Saxony                        | 4   | 1.3  |
| Thuringia                     | 4   | 1.3  |

**Supplementary Table C.** Average duration of use of different types of ICT in everyday nursing care (hours per day, n=303)

| Type of ICT                                     | Range | n (%)          |               |           |               |            |
|-------------------------------------------------|-------|----------------|---------------|-----------|---------------|------------|
|                                                 |       | No utilisation | 0.5-2.5 h/day | 3-5 h/day | 5.5-7.5 h/day | 8-10 h/day |
| Hospital information system <sup>1</sup>        | 0-10  | 32 (10.6)      | 134 (44.2)    | 83 (27.4) | 39 (12.9)     | 15 (5.0)   |
| Electronic care documentation                   | 0-10  | 66 (21.8)      | 131 (43.2)    | 53 (17.5) | 31 (10.2)     | 22 (7.3)   |
| Electronic health/ nursing records <sup>1</sup> | 0-10  | 84 (27.7)      | 125 (41.3)    | 45 (14.9) | 27 (8.9)      | 22 (7.3)   |
| Electronic planning of care processes           | 0-10  | 143 (47.2)     | 101 (33.3)    | 33 (10.9) | 15 (5.0)      | 11 (3.6)   |
| Digital medication management                   | 0-10  | 171 (56.4)     | 92 (30.4)     | 20 (6.6)  | 10 (3.3)      | 10 (3.3)   |
| Digital SOPs                                    | 0-10  | 228 (75.2)     | 60 (19.8)     | 9 (3.0)   | 1 (0.3)       | 5 (1.7)    |
| Decision support systems <sup>1</sup>           | 0-10  | 260 (85.8)     | 33 (10.9)     | 6 (2.0)   | 2 (0.7)       | 2 (0.7)    |
| Smartphone apps <sup>1</sup>                    | 0-8   | 268 (88.4)     | 28 (9.2)      | 4 (1.3)   | 2 (0.7)       | 1 (0.3)    |

<sup>1</sup> Percentages do not add up to 100% due to rounding.

**Supplementary Table D.** Descriptive statistics of the main study variables

| Variable                  | Range | Mean  | SD    | $\alpha$ |
|---------------------------|-------|-------|-------|----------|
| Techno-complexity         | 1-7   | 3.44  | 1.40  | 0.84     |
| Techno-overload           | 1-6.6 | 3.39  | 1.35  | 0.84     |
| Techno-usefulness         | 1-7   | 3.80  | 1.41  | 0.83     |
| Lack of technical support | 1-7   | 4.10  | 1.90  | 0.95     |
| Techno-unreliability      | 1-7   | 4.26  | 1.83  | 0.94     |
| Burnout                   | 0-100 | 49.86 | 19.90 | 0.91     |

$\alpha$  = Cronbach’s alpha, n = 303

Supplementary Table E. Correlation matrix of the main study variables

| Variable                            | 1       | 2       | 3       | 4       | 5       | 6       | 7   |
|-------------------------------------|---------|---------|---------|---------|---------|---------|-----|
| 1. Techno-complexity                | 303     |         |         |         |         |         |     |
| 2. Techno-overload                  | 0.618** | 303     |         |         |         |         |     |
| 3. Techno-usefulness                | 0.696** | 0.571** | 303     |         |         |         |     |
| 4. Lack of technical support        | 0.391** | 0.286** | 0.470** | 303     |         |         |     |
| 5. Techno-unreliability             | 0.463** | 0.416** | 0.513** | 0.752** | 303     |         |     |
| 6. Personal burnout                 | 0.291** | 0.329** | 0.224** | 0.187** | 0.245** | 303     |     |
| 7. Support by employer <sup>1</sup> | -0.002  | -0.044  | -0.134* | -0.123* | -0.064  | -0.125* | 296 |

Spearman’s correlation coefficient; n is shown on the diagonal; <sup>1</sup> No support as reference category; \* p <0.05  
\*\* p <0.01 (2-tailed)
